# Supplementary material
Source: HighWire-hosted journal article supplement (http://www.ajnr.org/highwire/filestream/77892/field_highwire_adjunct_files/0/20-00128.pdf)
Supplement: 20-00128.pdf [file 20-00128.pdf]

**On-line Table 1: Baseline characteristic in the overall study sample (n = 110)<sup>a</sup>**

|                                               | No. | Values        |
|-----------------------------------------------|-----|---------------|
| Age (mean) (SD) (yr)                          | 110 | 66.9 (12.1)   |
| Men                                           | 110 | 66 (60.0)     |
| Medical history                               |     |               |
| Hypertension                                  | 110 | 66 (60.0)     |
| Diabetes                                      | 110 | 19 (17.3)     |
| Hypercholesterolemia                          | 110 | 28 (25.5)     |
| Current smoking                               | 110 | 30 (27.3)     |
| Stroke history                                | 110 | 17 (15.5)     |
| Prior ischemic heart disease                  | 110 | 16 (14.6)     |
| Atrial fibrillation                           | 110 | 16 (14.5)     |
| Prior antithrombotic medication               | 110 | 39 (35.5)     |
| Antiplatelet drug                             | 110 | 29 (26.4)     |
| Anticoagulant drug                            | 110 | 11 (10.0)     |
| Current stroke event                          |     |               |
| Mothership                                    | 110 | 31 (28.4)     |
| Admission to intensive care                   | 110 | 80 (72.7)     |
| Coma/tetraplegia                              | 110 | 34 (30.9)     |
| Prestroke mRS                                 |     |               |
| 0                                             | 110 | 85 (77.3)     |
| 1                                             |     | 19 (17.3)     |
| 2                                             |     | 6 (5.5)       |
| Pretreatment NIHSS                            | 110 | 22 (14–40)    |
| Pretreatment GCS                              | 110 | 11 (3–14)     |
| Pretreatment systolic BP (mean) (SD) (mm Hg)  | 110 | 144 (27)      |
| Pretreatment diastolic BP (mean) (SD) (mm Hg) | 110 | 81 (17)       |
| Pretreatment glucose (mmol/L)                 | 110 | 6.9 (5.9–8.3) |
| Pretreatment PC-ASPECTS                       | 110 | 8 (7–9)       |
| Pretreatment DWI BSS                          | 110 | 2 (1–3)       |
| Stroke etiology                               |     |               |
| Atherosclerosis                               | 110 | 28 (25.5)     |
| Cardioembolic                                 |     | 38 (34.5)     |
| Other                                         |     | 16 (14.5)     |
| Undetermined or unknown                       |     | 28 (25.5)     |
| Occlusion level                               |     |               |
| Proximal                                      | 110 | 34 (30.9)     |
| Middle                                        |     | 23 (20.9)     |
| Distal                                        |     | 53 (48.2)     |
| Collateral PcomA flow                         |     |               |
| None                                          | 110 | 48 (43.6)     |
| Unilateral                                    |     | 29 (26.4)     |
| Bilateral                                     |     | 33 (30.0)     |
| Thalamus involvement                          | 110 | 24 (21.8)     |
| Treatment characteristic                      |     |               |
| IV thrombolysis                               | 110 | 41 (37.3)     |
| Onset to IV thrombolysis <sup>b</sup>         | 41  | 230 (180–310) |
| General anesthesia                            | 110 | 79 (71.8)     |
| Procedural times (min)                        |     |               |
| Onset to imaging                              | 110 | 295 (177–425) |
| Imaging to puncture                           | 110 | 99 (60–210)   |
| Onset to groin puncture                       | 110 | 410 (280–540) |
| Thrombectomy                                  |     |               |
| None <sup>c</sup>                             | 110 | 10 (9.1)      |
| Stent retriever                               |     | 33 (30.0)     |
| Contact aspiration                            |     | 26 (23.6)     |
| Stent retriever and contact aspiration        |     | 41 (37.3)     |
| Rescue therapy                                |     |               |
| None                                          | 110 | 96 (87.3)     |
| Pharmacologic                                 |     | 13 (11.8)     |
| Mechanical                                    |     | 1 (0.9)       |

**Note:**—BP indicates blood pressure.

<sup>a</sup>Values are number (%) or median (IQR) unless otherwise as indicated.

<sup>b</sup>Data among patients treated with IV thrombolysis.

<sup>c</sup>Due to unsuccessful attempts to cross the occlusion (n = 4), early perforation (n = 2), or clot access failure (n = 4).

**On-line Table 2: Comparison of baseline treatment characteristics and periprocedural outcomes between patients with and without favorable outcome at 90 days<sup>a</sup>**

| Baseline Characteristics                      | Favorable Outcome (mRS 0–2) |               | P    |
|-----------------------------------------------|-----------------------------|---------------|------|
|                                               | No (n = 75)                 | Yes (n = 35)  |      |
| Age (mean) (SD) (yr)                          | 68.2 (12.0)                 | 64.2 (12.1)   | .11  |
| Men                                           | 47 (62.7)                   | 19 (54.3)     | .40  |
| Hypertension                                  | 48 (64.0)                   | 18 (51.4)     | .21  |
| Hypercholesterolemia                          | 16 (21.3)                   | 12 (34.3)     | .15  |
| Diabetes mellitus                             | 16 (21.3)                   | 3 (8.6)       | .10  |
| Current smoker                                | 19 (25.3)                   | 11 (31.4)     | .50  |
| Stroke history                                | 10 (13.3)                   | 7 (20.0)      | .37  |
| Prior ischemic heart disease                  | 11 (14.7)                   | 5 (14.3)      | .96  |
| Atrial fibrillation                           | 14 (18.7)                   | 2 (5.7)       | .073 |
| Prior use of antithrombotic medications       | 27 (36.0)                   | 12 (34.3)     | .86  |
| Mothership                                    | 16 (21.6)                   | 15 (42.9)     | .022 |
| Admission to intensive care                   | 61 (81.3)                   | 19 (54.3)     | .003 |
| Coma/tetraplegia                              | 25 (33.3)                   | 9 (25.7)      | .42  |
| Prestroke mRS $\geq$ 1                        | 17 (22.7)                   | 8 (22.9)      | .98  |
| Pretreatment NIHSS                            | 40 (15–40)                  | 19 (12–25)    | .010 |
| Pretreatment GCS                              | 3 (3–14)                    | 12 (8–15)     | .006 |
| Pretreatment systolic BP (mean) (SD) (mm Hg)  | 145 (28)                    | 141 (25)      | .42  |
| Pretreatment diastolic BP (mean) (SD) (mm Hg) | 81 (18)                     | 80 (13)       | .94  |
| Pretreatment glucose (mmol/L)                 | 7.0 (5.8–9.1)               | 6.6 (6.0–7.8) | .37  |
| Pretreatment PC-ASPECTS                       | 8 (6–9)                     | 9 (8–9)       | .002 |
| Pretreatment DWI BSS                          | 2 (1–4)                     | 2 (0–3)       | .064 |
| Cardioembolic etiology                        | 23 (30.7)                   | 15 (42.9)     | .21  |
| Occlusion level                               |                             |               |      |
| Proximal                                      | 28 (37.3)                   | 6 (17.1)      | .10  |
| Middle                                        | 14 (18.7)                   | 9 (25.7)      |      |
| Distal                                        | 33 (44.0)                   | 20 (57.1)     |      |
| PcomA collateral flow                         | 37 (49.3)                   | 25 (71.4)     | .030 |
| Thalamus involvement                          | 20 (26.7)                   | 4 (11.4)      | .071 |
| Treatment characteristics                     |                             |               |      |
| IV thrombolysis                               | 22 (29.3)                   | 19 (54.3)     | .012 |
| General anesthesia                            | 55 (73.3)                   | 24 (68.6)     | .61  |
| Onset-to-groin puncture (min)                 | 440 (330–565)               | 335 (240–465) | .027 |
| Thrombectomy                                  |                             |               |      |
| None                                          | 9 (12.0)                    | 1 (2.8)       | .37  |
| Stent retriever                               | 21 (28.0)                   | 12 (34.3)     |      |
| Contact aspiration                            | 16 (21.3)                   | 10 (28.6)     |      |
| Stent retriever and contact aspiration        | 29 (38.7)                   | 12 (34.3)     |      |
| Periprocedural outcomes                       |                             |               |      |
| Recanalization grade                          |                             |               |      |
| No (mTICI 0–2a)                               | 17 (22.7)                   | 3 (8.6)       | .001 |
| Partial (mTICI 2b)                            | 21 (28.0)                   | 2 (5.7)       |      |
| Complete (mTICI 3)                            | 37 (49.3)                   | 30 (85.7)     |      |
| Procedural complications                      | 19 (25.3)                   | 4 (11.4)      | .10  |
| Growth of infarct core                        | 22 (29.3)                   | 13 (37.1)     | .41  |
| Any ICH                                       | 11 (14.7)                   | 2 (5.7)       | .22  |

**Note:**—BP indicates blood pressure; ICH, Intracranial hemorrhage.

<sup>a</sup> Values are number (%) or median (IQR) unless otherwise as indicated.

**On-line Table 3: Independent predictors of good outcome by considering pretreatment GCS rather than pretreatment NIHSS as candidate predictors<sup>a</sup>**

|                         | Model 1             |      | Model 2             |       |
|-------------------------|---------------------|------|---------------------|-------|
|                         | OR (95% CI)         | P    | OR (95% CI)         | P     |
| Pretreatment GCS        | 1.15 (1.04–1.27)    | .005 | 1.12 (1.02–1.24)    | .016  |
| PcomA collateral flow   | 3.02 (1.09–8.30)    | .033 | 3.33 (1.21–9.15)    | .020  |
| IV thrombolysis         | 2.75 (1.05–7.18)    | .038 | Not selected        |       |
| Atrial fibrillation     | 0.23 (0.04–1.17)    | .076 | Not selected        |       |
| Onset to groin puncture | 0.95 (0.88–1.01)    | .053 | Not selected        |       |
| Pretreatment DWI BSS    | 0.73 (0.52–1.02)    | .065 | 0.71 (0.50–0.99)    | .043  |
| Complete recanalization | Not included        | –    | 6.89 (2.23–21.28)   | <.001 |
| C-statistics (95% CI)   | 0.806 (0.712–0.900) |      | 0.826 (0.741–0.911) |       |
| Goodness-of-fit test    | P = .018            |      | P = .56             |       |

**Note:**— indicates not available.

<sup>a</sup> ORs were calculated using a backward-stepwise multivariable penalized-likelihood logistic model. Candidate predictors in model 1 were mothership, admission to intensive care, atrial fibrillation, pretreatment NIHSS, pretreatment ASPECTS, pretreatment DWI BSS, IV thrombolysis, PcomA collateral flow, thalamus involvement, and onset-to-groin puncture time. Candidate predictors in model 2 were admission to mothership, admission to intensive care, pretreatment NIHSS, pretreatment ASPECTS, IV thrombolysis, PcomA collateral flow, onset-to-groin puncture time, and complete recanalization (mTICI 3).

ABAO to January 2011- October 2018.

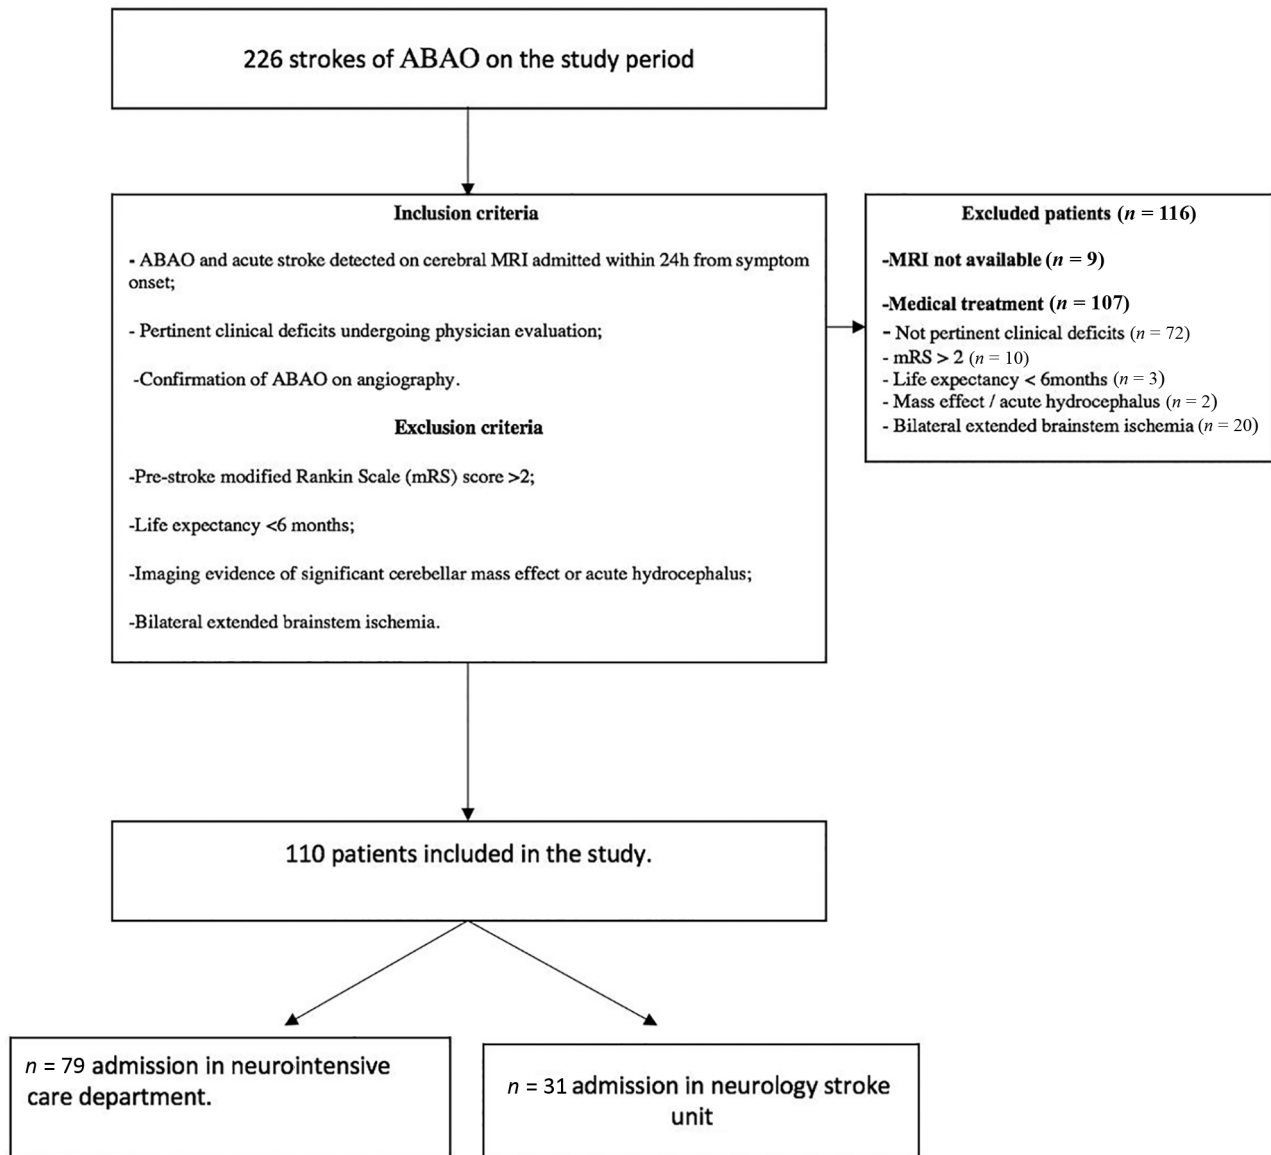

**ON-LINE FIG 1.** Flow chart of the study.

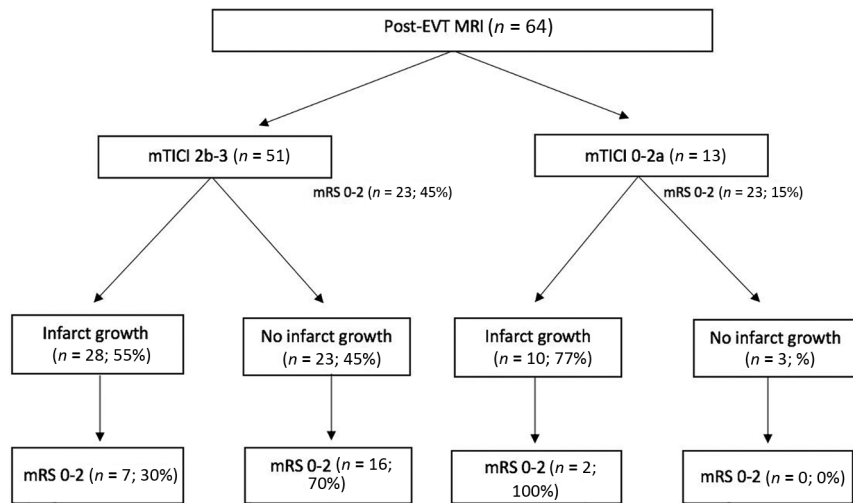

**ON-LINE FIG 2.** Evolution of the PC-ASPECTS score according to the mTICI score and good outcome.

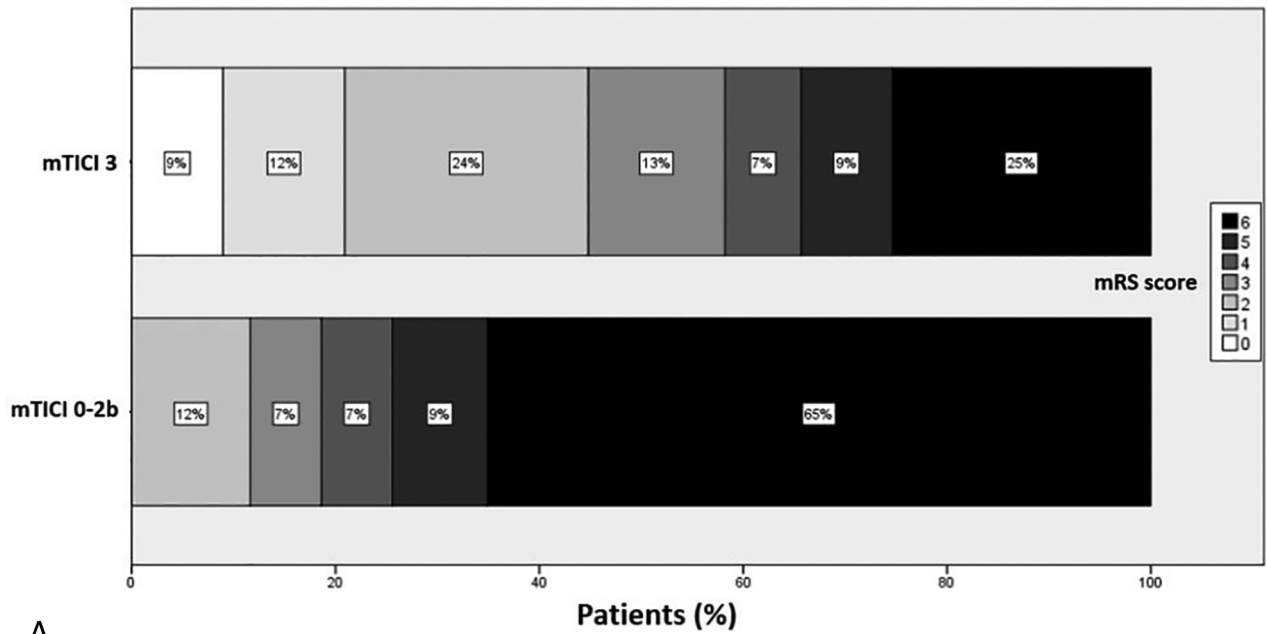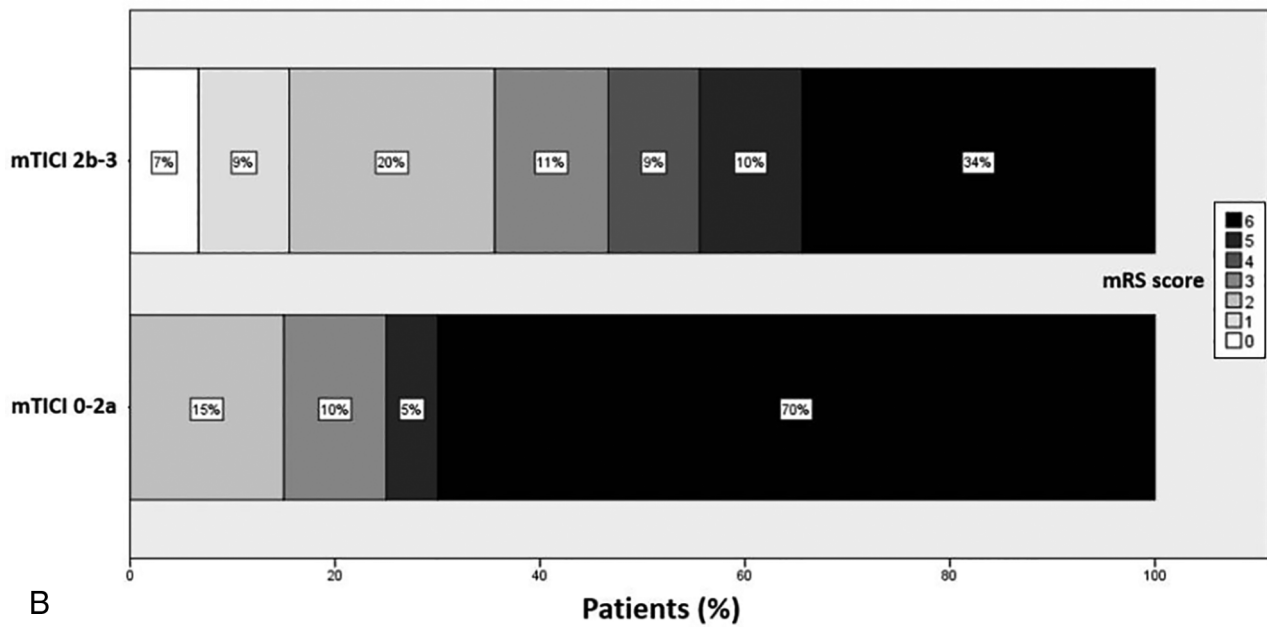

**ON-LINE FIG 3.** Functional outcomes at 90 days according to the mRS score. Distribution of 90-day mRS scores in patients with complete (mTICI 3) versus mTICI 0–2b reperfusion (A) and success of reperfusion (mTICI 2b–3) versus mTICI 0-2a (B). Scores range from 0 to 6, with higher scores indicating greater disability.
